# Supplementary material for: Comparative transcriptomics reveals shared gene expression changes during independent evolutionary origins of stem and hypocotyl/root tubers in Brassica (Brassicaceae)
Source: PubMed Central journal article supplement (PMC5983522; doi:10.1371/journal.pone.0197166), 2018-06-01

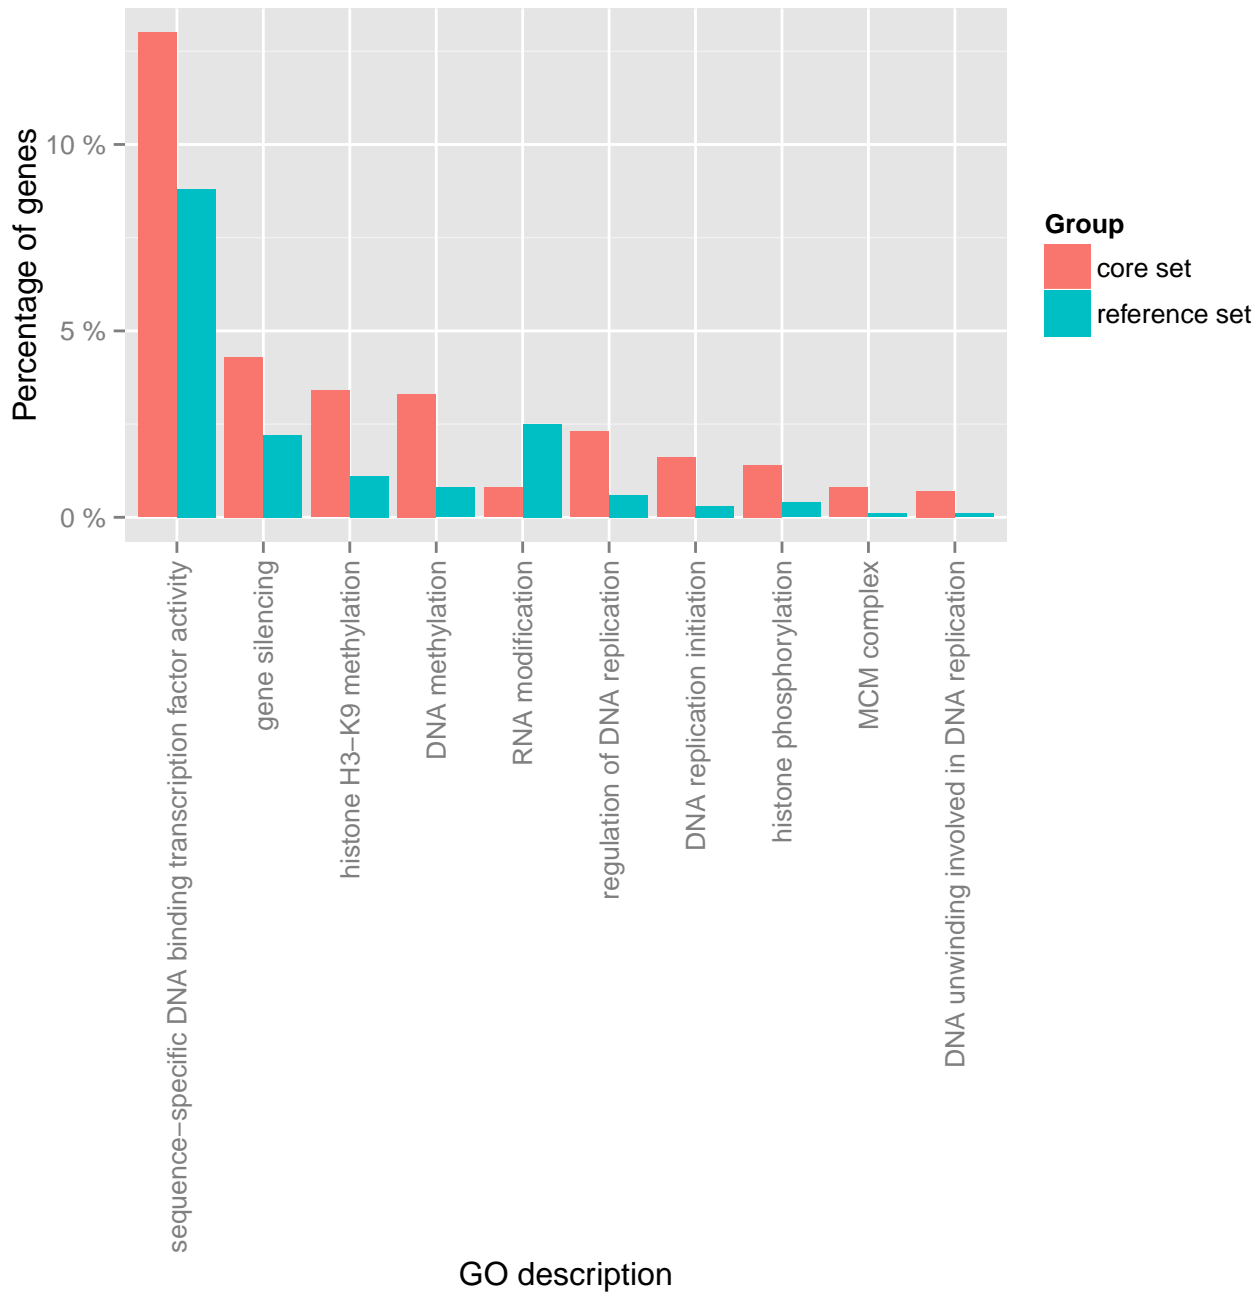

Supplement: pone.0197166.s002.pdf [file pone.0197166.s002.pdf]
